# Supplementary material for: Structural network efficiency mediates the association between glymphatic function and cognition in mild VCI: a DTI-ALPS study
Source: PubMed Central journal article supplement (PMC9708722; doi:10.3389/fnagi.2022.974114), 2022-11-16
Supplement: Table_1.pdf [file Table_1.pdf]

## *Supplementary Material*

### 1 Supplementary Tables

**Supplementary table 1** Demographics and Clinical Characteristics of SVDN and SVCI

| Characteristics                                            | SVDN<br>(N = 33) | SVCI<br>(N = 40)  | t / $\chi^2$ /<br>Z | P-value |
|------------------------------------------------------------|------------------|-------------------|---------------------|---------|
| Age, y, mean $\pm$ SD                                      | 61.33 $\pm$ 4.47 | 61.03 $\pm$ 5.23  | 0.27                | 0.790   |
| Female, n (%)                                              | 9 (27.2%)        | 11 (27.5%)        | 0.00                | 1.000   |
| Education, y, mean $\pm$ SD                                | 12.64 $\pm$ 2.70 | 12.15 $\pm$ 2.53  | 0.79                | 0.430   |
| Hypertension, n (%)                                        | 15 (45.4%)       | 29 (72.5%)        | 5.52                | 0.019*  |
| Hyperlipemia, n (%)                                        | 22 (66.6%)       | 16 (40%)          | 5.15                | 0.023*  |
| Diabetes, n (%)                                            | 10 (30.3%)       | 17 (42.5%)        | 1.15                | 0.283   |
| History of smoking, n (%)                                  | 14 (42.4%)       | 21 (52.5%)        | 0.74                | 0.391   |
| FSRP score, mean $\pm$ SD                                  | 7.55 $\pm$ 3.73  | 9.73 $\pm$ 3.73   | -2.48               | 0.015*  |
| MoCA, mean $\pm$ SD                                        | 26.30 $\pm$ 1.65 | 17.35 $\pm$ 4.40  | 11.07               | <0.001* |
| Lacune, n, median (interquartile range)                    | 0 (1-1)          | 2 (1-6.75)        | -4.75               | <0.001* |
| WMH volume, mL, median                                     | 0.77 (0.27-1.62) | 2.39 (0.78-10.31) | -3.44               | 0.001*  |
| Basal ganglia EPVS score, median (interquartile range)     | 2 (1-2)          | 2 (1-2)           | -1.55               | 0.120   |
| Centrum semiovale EPVS score, median (interquartile range) | 1 (0-1)          | 1 (0-1)           | -0.87               | 0.385   |

SVDN, cerebral small vessel disease with normal cognition; SVCI, cerebral small vessel disease cognitive impairment; FSRP, Framingham Stroke Risk Profile; MoCA, Montreal Cognitive Assessment; WMH, white matter hyperintensities; EPVS, enlarged perivascular spaces; SD, standard deviation; \*, the difference is statistically significant.

**Supplementary table 2** Demographics and Clinical Characteristics of PSCN and PSCI

| Characteristics                                            | PSCN<br>(N = 14) | PSCI<br>(N = 39)  | t / $\chi^2$ /<br>Z | P-value |
|------------------------------------------------------------|------------------|-------------------|---------------------|---------|
| Age, y, mean $\pm$ SD                                      | 61.50 $\pm$ 5.46 | 62.28 $\pm$ 5.46  | -0.46               | 0.648   |
| Female, n (%)                                              | 3 (21.4%)        | 9 (23.0%)         | 0.02                | 0.899   |
| Education, y, mean $\pm$ SD                                | 12.64 $\pm$ 2.37 | 12.80 $\pm$ 2.88  | -0.17               | 0.860   |
| Hypertension, n (%)                                        | 7 (50.0%)        | 27 (69.2%)        | 1.66                | 0.198   |
| Hyperlipemia, n (%)                                        | 4 (28.5%)        | 16 (41%)          | 0.68                | 0.410   |
| Diabetes, n (%)                                            | 5 (35.7%)        | 18 (46.1%)        | 0.46                | 0.499   |
| History of smoking, n (%)                                  | 11 (78.5%)       | 26 (66.6%)        | 0.70                | 0.405   |
| FSRP score, mean $\pm$ SD                                  | 9.50 $\pm$ 2.96  | 11.21 $\pm$ 4.73  | -1.26               | 0.214   |
| MoCA, mean $\pm$ SD                                        | 25.43 $\pm$ 1.40 | 14.82 $\pm$ 5.17  | 7.54                | <0.001* |
| Lacune, n, median (interquartile range)                    | 3 (1-4.25)       | 5 (3-9)           | -4.75               | 0.012*  |
| WMH volume, mL, median                                     | 3.11 (1.22-6.09) | 6.66 (2.31-16.44) | -3.44               | 0.079   |
| Basal ganglia EPVS score, median (interquartile range)     | 1 (1-2)          | 2 (2-2)           | -1.55               | 0.001*  |
| Centrum semiovale EPVS score, median (interquartile range) | 1 (1-1)          | 1(0-1)            | -0.87               | 0.100   |

PSCN, post-stroke cognitively normal; PSCI, post-stroke cognitive impairment; FSRP, Framingham Stroke Risk Profile; MoCA, Montreal Cognitive Assessment; WMH, white matter hyperintensities; EPVS, enlarged perivascular spaces; SD, standard deviation; \*, the difference is statistically significant.
